# Supplementary material for: Dispersing Pd nanoparticles on N-doped TiO2: a highly selective catalyst for H2O2 synthesis
Source: Royal Society of Chemistry journal article supplement (doi:10.1039/c5cy02275d), 2016-01-01
Supplement: c5cy02275d1.pdf [file c5cy02275d1.pdf]

## SUPPLEMENTARY MATERIAL

### Dispersing Pd nanoparticles on N-doped TiO<sub>2</sub>: A highly selective catalyst for H<sub>2</sub>O<sub>2</sub> synthesis

Can Ao<sup>a</sup>, Pengfei Tian<sup>a</sup>, Like Ouyang<sup>a</sup>, Guojin Da<sup>a</sup>, Xingyan Xu<sup>a</sup>, Jing Xu<sup>a</sup> and Yi-Fan Han<sup>\*a, b</sup>

---

<sup>a</sup> State Key Laboratory of Chemical Engineering, East China University of Science and Technology, Shanghai, 200237, China.

<sup>b</sup> Research Center of Heterogeneous Catalysis and Engineering Sciences, School of Chemical Engineering and Energy, Zhengzhou University, Zhengzhou 450001, China.

† E-mail: [yifanhan@ecust.edu.cn](mailto:yifanhan@ecust.edu.cn).

Tel: +86-21-64251928, Fax: +86-21-64251928

Electronic Supplementary Information (ESI) available: [details of any supplementary information available should be included here]. See DOI:10.1039/x0xx00000x

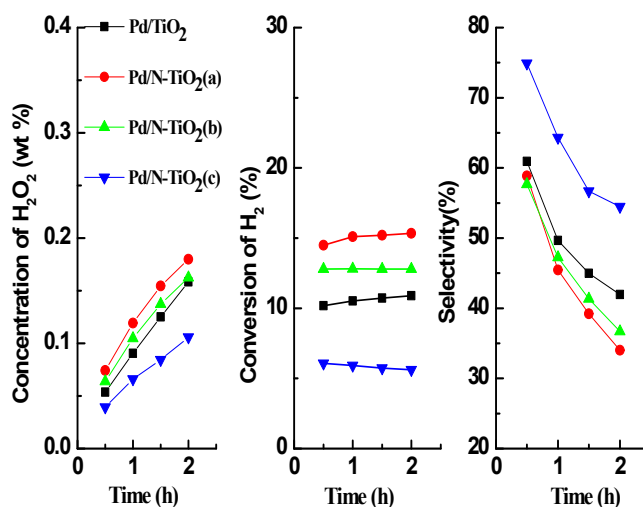

Fig. S1. Catalytic performance of Pd and Pd/N catalysts.

The catalytic results of catalyst with different Pd loadings for 2 h. Catalytic tests were carried out in the solution of 60 mL acidified ethanol by a tri-phase semi-batch reactor at 283 K, atmospheric pressure, a total flow rate of 60 mL/min with H<sub>2</sub>:O<sub>2</sub>:N<sub>2</sub>=9:36:15. The amount of catalyst was 50 mg for each test unless specially emphasized.

Table S1. Catalytic performance of Pd catalysts with different thermal treatment

| Catalysts                             | Conversion (%) | H <sub>2</sub> O <sub>2</sub> Selectivity (%) | H <sub>2</sub> O <sub>2</sub> Productivity (mol H <sub>2</sub> O <sub>2</sub> g <sub>Pd</sub> <sup>-1</sup> h <sup>-1</sup> ) |
|---------------------------------------|----------------|-----------------------------------------------|-------------------------------------------------------------------------------------------------------------------------------|
| Pd/TiO <sub>2</sub>                   | 10.2           | 60.9                                          | 3.0                                                                                                                           |
| Pd/TiO <sub>2</sub> (H <sub>2</sub> ) | 10.9           | 57.1                                          | 3.0                                                                                                                           |
| Pd/TiO <sub>2</sub> (O <sub>2</sub> ) | 8.4            | 62.6                                          | 2.5                                                                                                                           |
| Pd/TiO <sub>2</sub> (N <sub>2</sub> ) | 7.3            | 60.2                                          | 2.1                                                                                                                           |

All experiments were carried out in the solution of H<sub>2</sub>SO<sub>4</sub> (0.12 M)-ethanol by a tri-phase semi-batch reactor at ambient pressure and 1000 rpm for 2 h. The amount of catalyst was 50 mg for each test unless specially emphasized and all experiments were carried out for 0.5 h.
